# Supplementary material for: Turn-on mode probe based on the sustainable xanthohumol extract for the efficient viscosity response in a liquid system
Source: Royal Society of Chemistry journal article supplement (doi:10.1039/d4ra02612h), 2024-01-01
Supplement: d4ra02612h1.pdf [file d4ra02612h1.pdf]

# RSC Advances

## Supplementary Information

### **Turn-on mode probe based on the sustainable xanthohumol extract for the efficient viscosity response in liquid system**

Lingfeng Xu,<sup>1,2,3\*</sup> Xinya Liu<sup>1</sup>, Jingyi Zhao<sup>1</sup>, Xinmin Deng<sup>1</sup>, and Hui Peng<sup>1</sup>

*1 Key Laboratory of Special Optoelectronic Artificial Crystal Materials of Jiangxi Province, Jingtangshan University, Ji'an, Jiangxi 343009, China*

*2 State Key Laboratory of Luminescent Materials & Devices, College of Materials Science & Engineering, South China University of Technology, Guangzhou, Guangdong 510640, China*

*3 School of Chemistry and Chemical Engineering, Nanchang University, Nanchang, Jiangxi 330036, China*

\* Corresponding author. E-mail: [rs7lfxu@outlook.com](mailto:rs7lfxu@outlook.com).

## Table of contents

|                           |    |
|---------------------------|----|
| Experimental section..... | 1  |
| Figure S1.....            | 2  |
| Figure S2.....            | 2  |
| Figure S3.....            | 3  |
| Figure S4.....            | 4  |
| Figure S5.....            | 5  |
| Figure S6.....            | 6  |
| Figure S7.....            | 7  |
| Figure S8.....            | 8  |
| Figure S9.....            | 9  |
| Figure S10.....           | 10 |
| Figure S11.....           | 11 |
| Table S1.....             | 12 |
| Table S2.....             | 14 |
| Table S3.....             | 14 |
| Table S4.....             | 14 |
| Table S5.....             | 15 |
| References.....           | 16 |

## **Experimental section**

### **1 Materials and apparatus**

The hops (female flowers of *Humulus lupulus* L.) were kindly supplied by the Shandong Fengtai Biotech. Co., Ltd. Tetrahydrofuran (THF), toluene, dimethylsulfoxide (DMSO), N, N-dimethylformamide (DMF), methanol, ethyl acetate (EA), glycerol and various metal salts were purchased from Shanghai Aladdin Bio-Chem Technology Co., Ltd. The glucose, D-mannitol, acesulfame, sorbitol, sodium carboxymethyl cellulose (SCC), pectin (Pec), xanthan gum (XG), trisodium citrate dehydrate (TCD), vitamin C (VC), sodium benzoate (SB) and beet molasses (BM) were obtained from Shanghai Macklin Biochemical Company. All the chemical reagents used in this work were of analytical grade and used as received.

### **2 The Förster–Hoffmann equation**

Förster–Hoffmann equation:

$$\log I = C + x \log \eta \quad (1)$$

where  $\eta$  represents the viscosity,  $I$  represents the fluorescence intensity of the natural molecular probe XTH at 425 nm,  $C$  is a constant, and  $x$  represents the sensitivity of the natural molecular probe XTH toward viscosity.

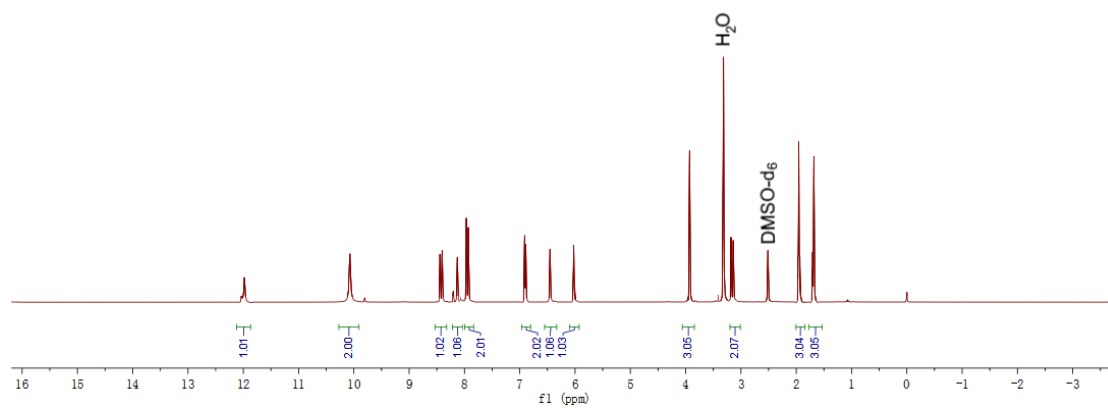

**Figure S1**  $^1\text{H}$  NMR spectrum of the extracted molecular probe xanthohumol (XTH).

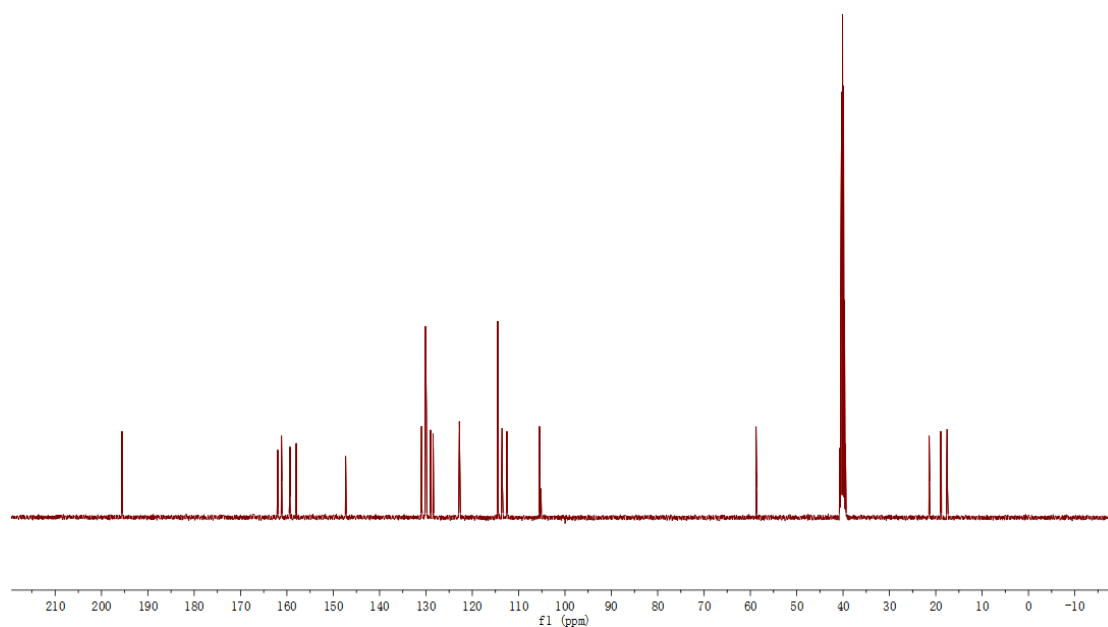

**Figure S2**  $^{13}\text{C}$  NMR spectrum of the extracted molecular probe xanthohumol (XTH).

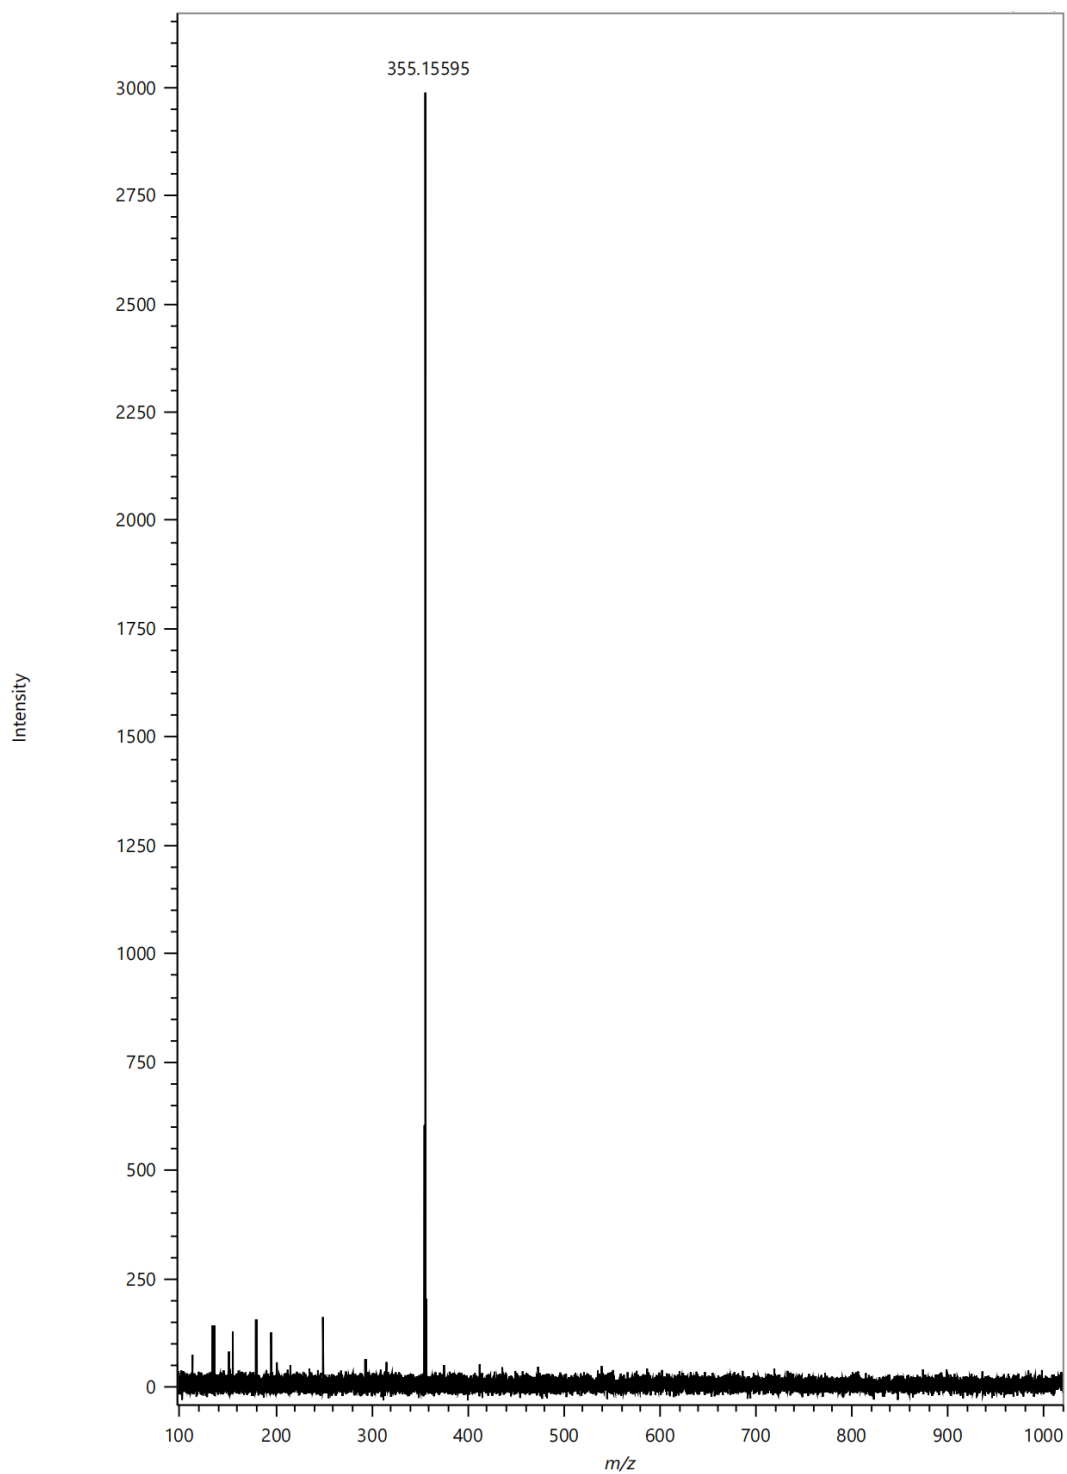

**Figure S3** HR mass spectrum of the extracted molecular probe xanthohumol (XTH).

MS (ESI):  $m/z$  355.15595  $[M+H]^+$ .

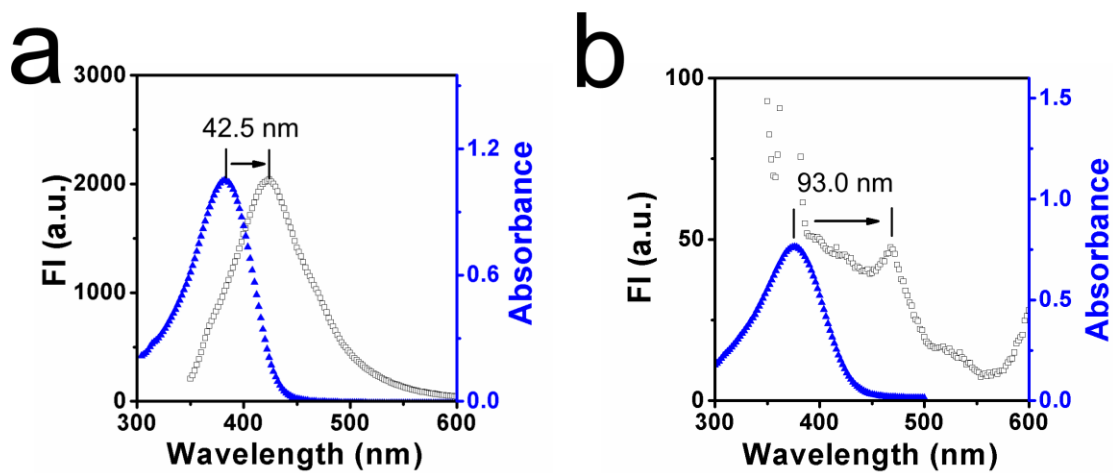

**Figure S4** (a) Recorded absorption and emission spectra of XTH in glycerol. (b)

Recorded absorption and emission spectra of XTH in distilled water.

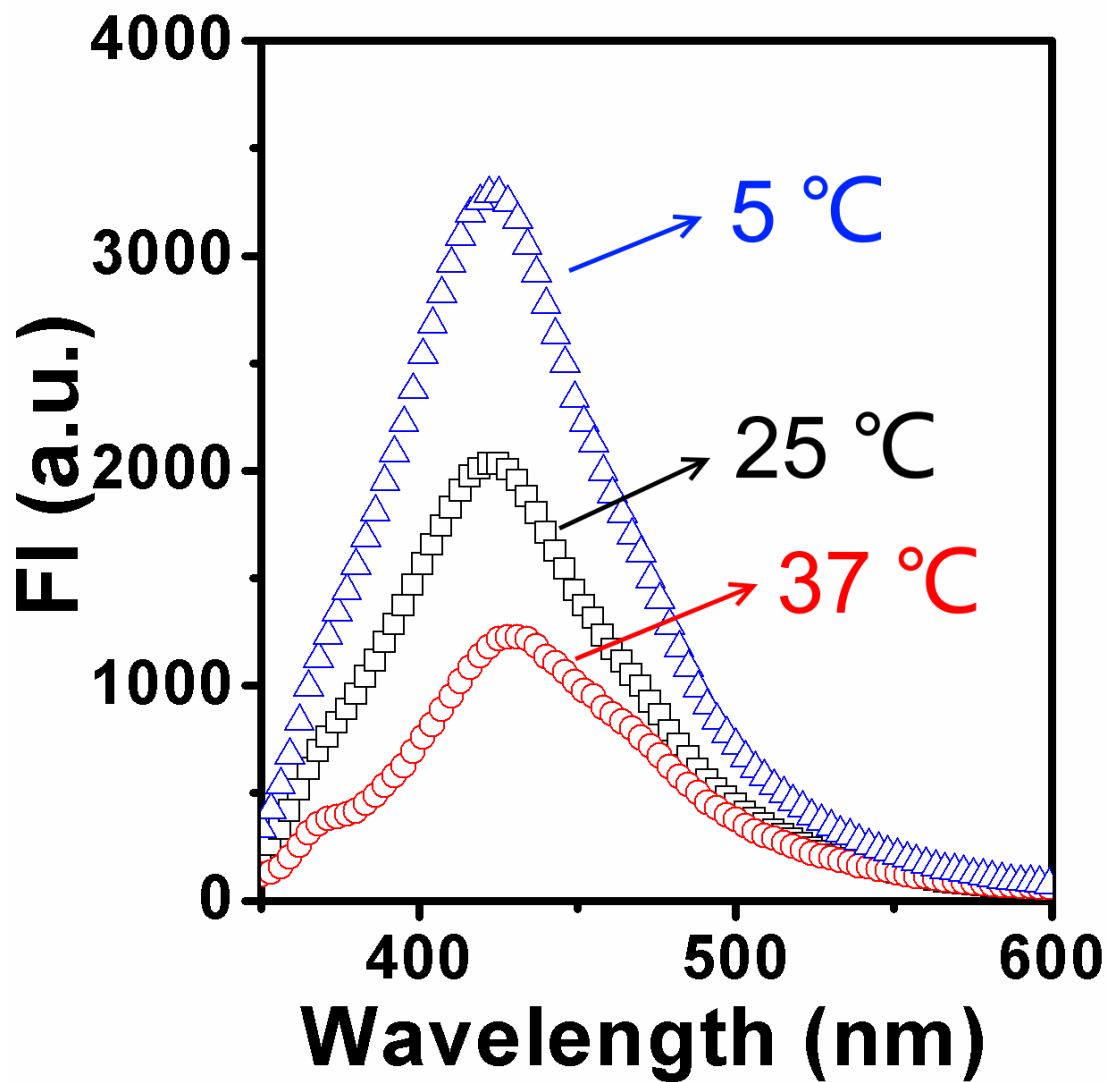

**Figure S5** Fluorescence spectra of the natural molecular probe XTH (10  $\mu$ M) in glycerol under different temperature, including the ambient temperature (25 °C), higher storage temperature (37 °C), and lower-maintenance temperature (5 °C).

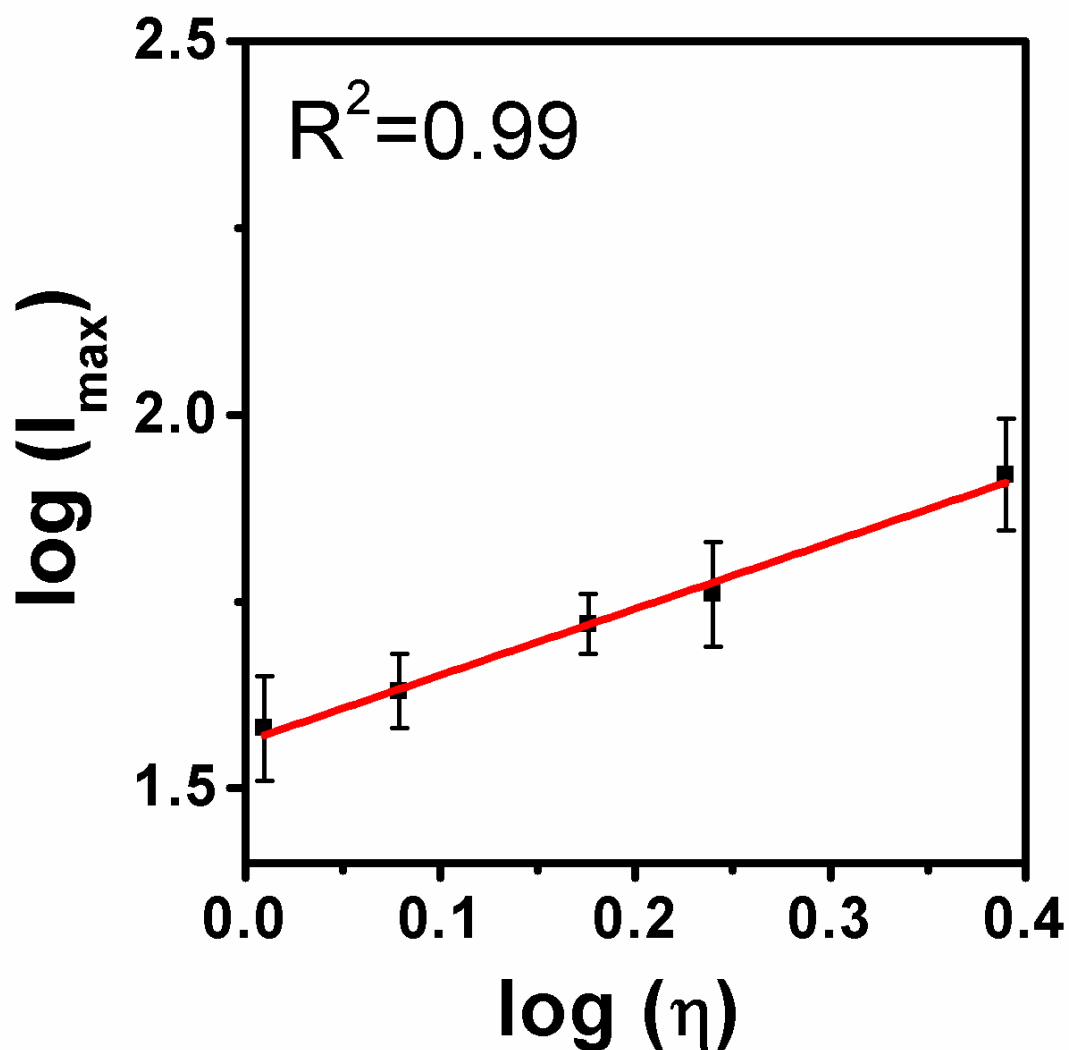

**Figure S6** Detection limit of the natural molecular probe xanthohumol (XTH).

The calibration curve was first obtained from the plot of  $\log(I_{\max})$  as a function of  $\log(\eta)$ . Then the regression curve equation was obtained for the lower viscosity part.

The detection limit =  $3 \times S.D./k$

Where  $k$  is the slope of the curve equation, and  $S.D.$  represents the standard deviation for the  $\log(I_{\max})$  of natural molecular probe XTH.

$$\log(I_{\max}) = 1.562 + 0.890 \times \log(\eta) \quad (R^2 = 0.990)$$

$$\log(\text{LOD}) = 3 \times 0.036/0.890 = 0.121$$

$$\text{LOD} = 10^{0.121} = 1.321 \text{ cP}$$



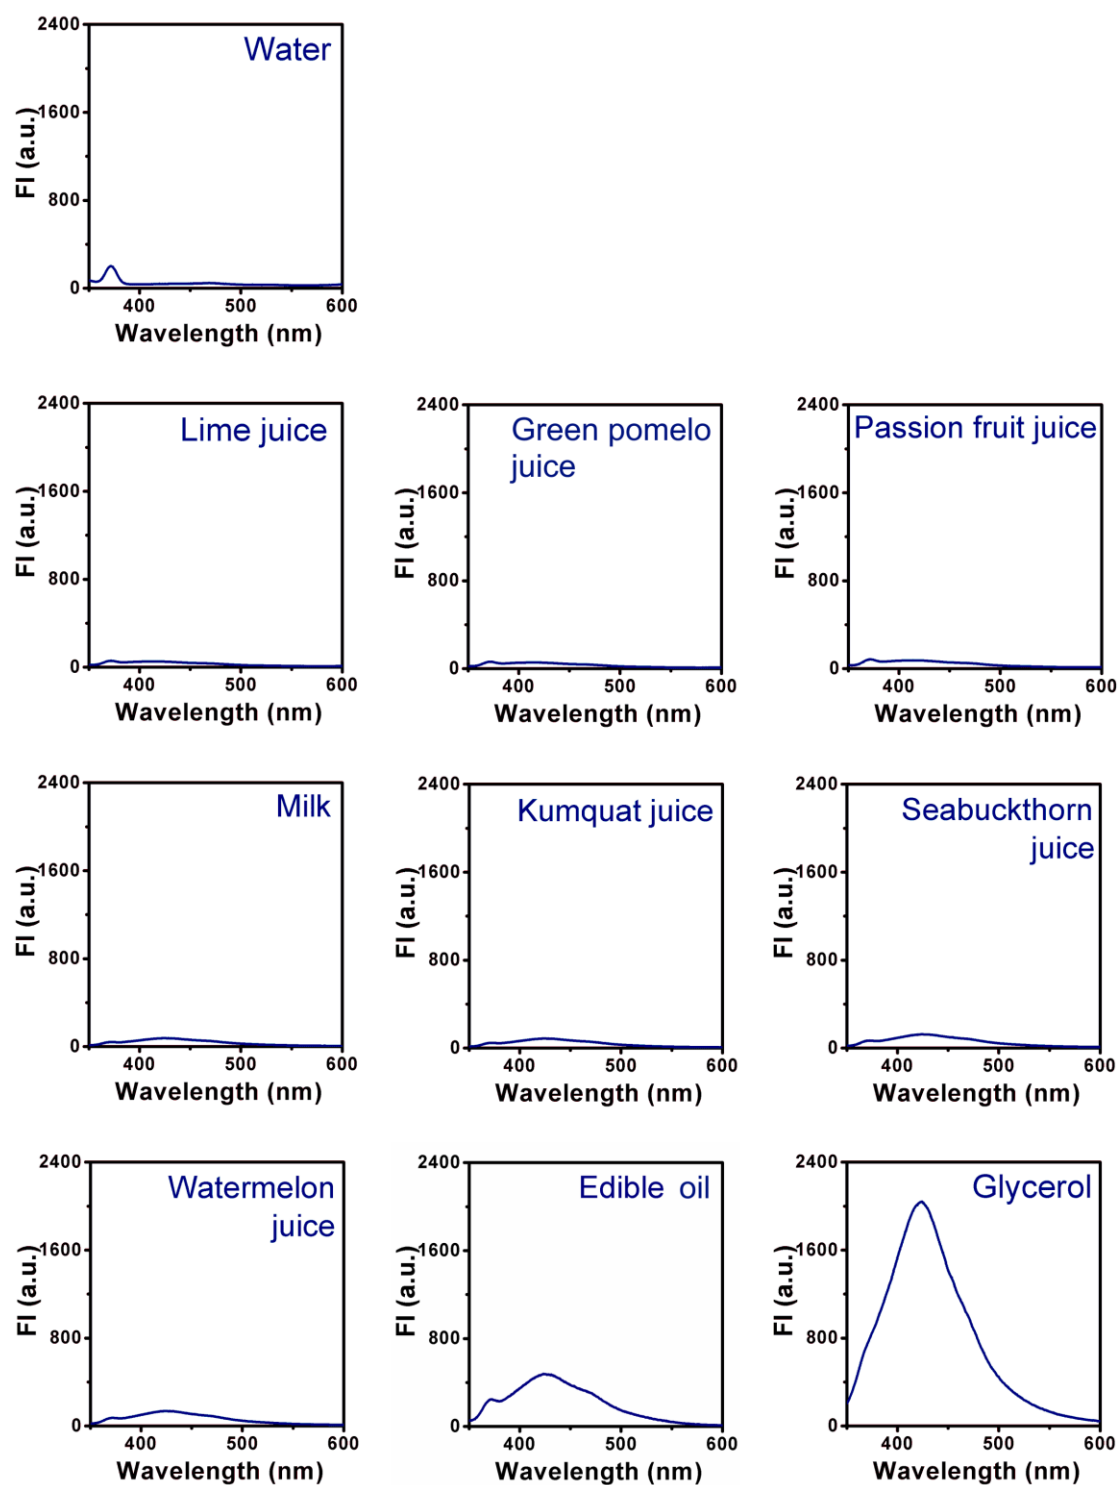

**Figure S7** Fluorescence spectra of the natural molecular probe XTH (10  $\mu\text{M}$ ) in ten kinds of common liquids, including the distilled water, lime juice, green pomelo juice, passion fruit juice, milk, kumquat juice, seabuckthorn juice, watermelon juice, edible oil and glycerol,  $\lambda_{\text{ex}}=320$  nm.

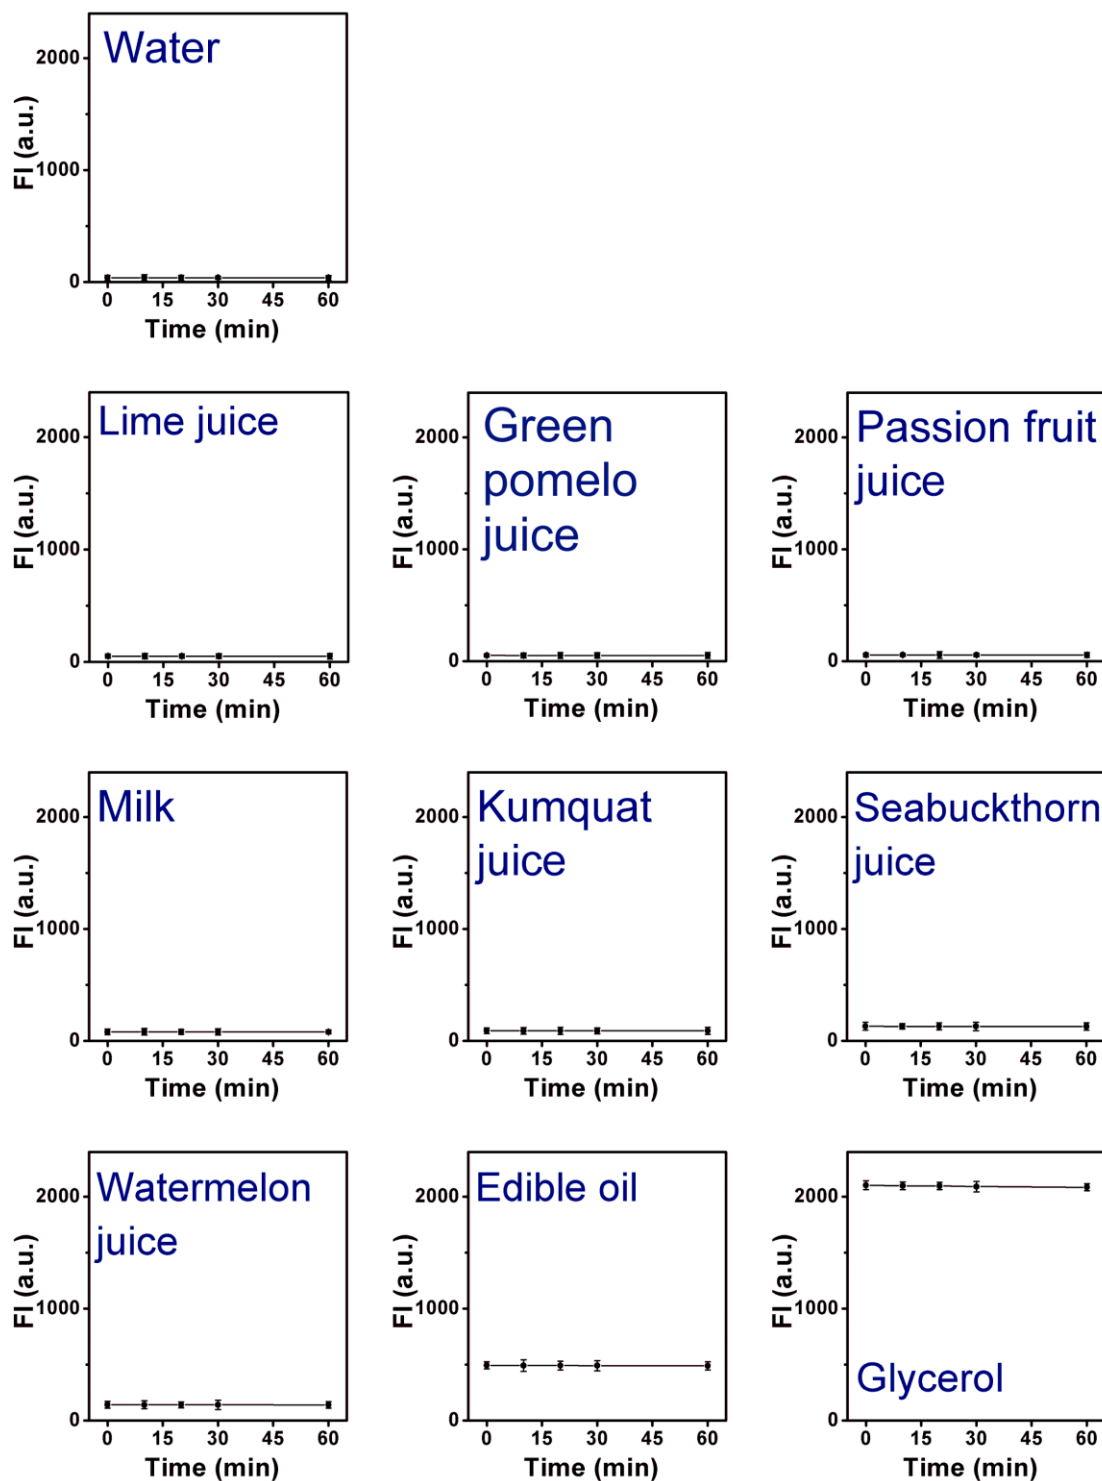

**Figure S8** Photo-stability analysis of the natural molecular probe XTH in the glycerol and other eight kinds of common liquids. All upon samples were tested under continuous light irradiation with 320 nm UV lamp.

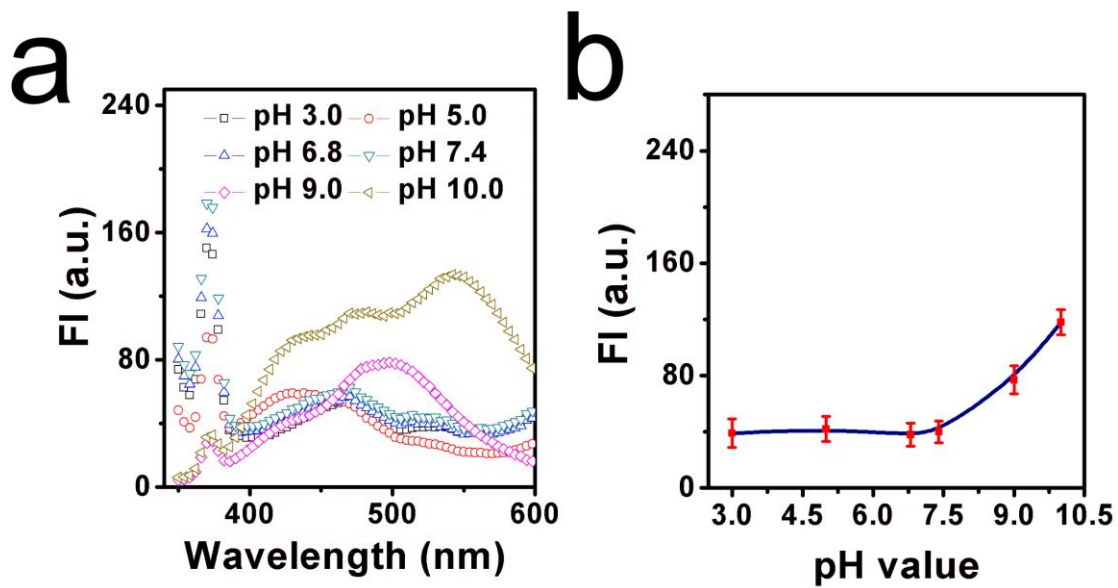

**Figure S9** Fluorescence emission intensity of the natural molecular probe XTH (10  $\mu$ M) under various pH values in the distilled viscosity water,  $\lambda_{ex}$ =320 nm.

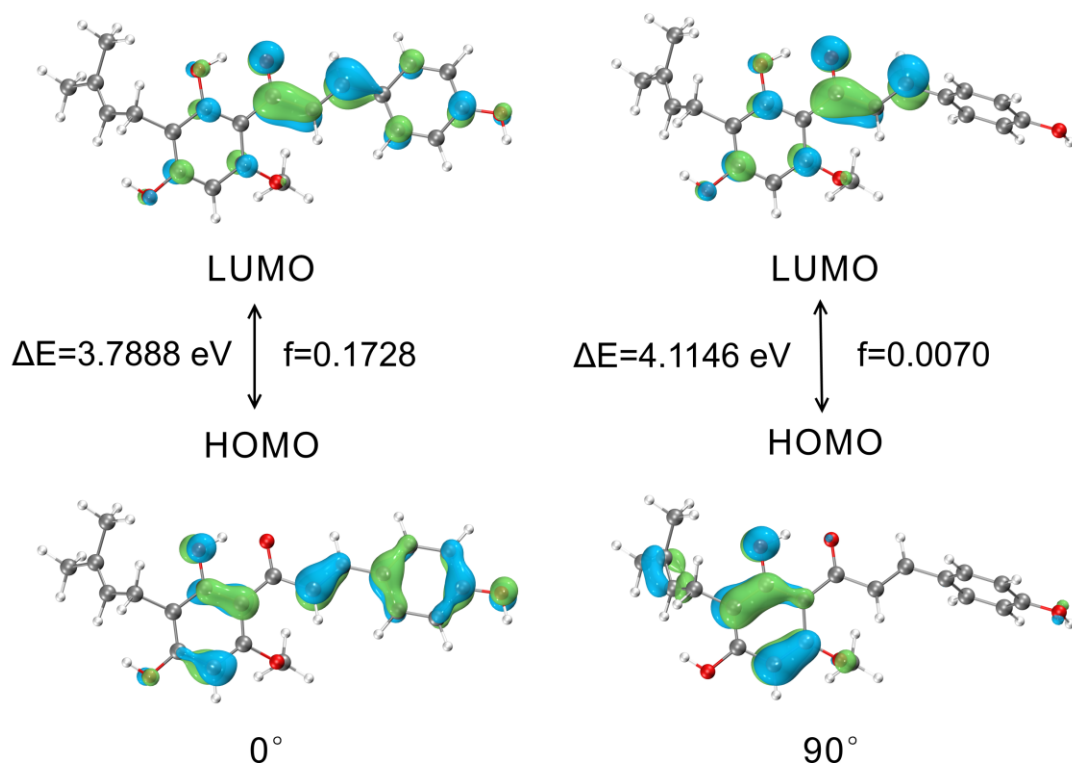

**Figure S10** Optimized molecular structure and calculated molecular orbital energy levels of the LUMOs and HOMOs of XTH based on B3LYP/6-31G basis set.

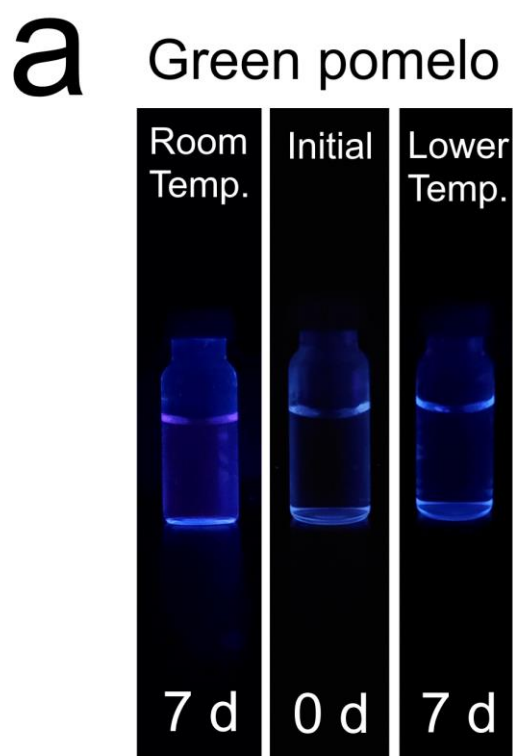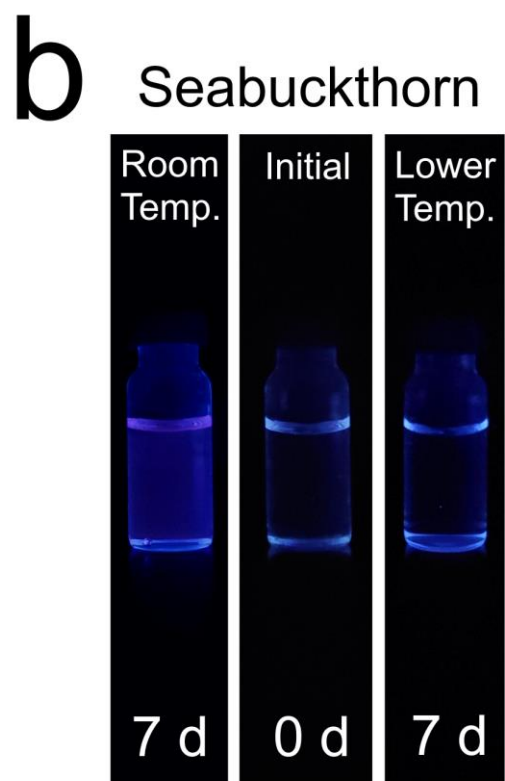

**Figure S11** Emission fluorescence signal of green pomelo juice and seabuckthorn juice under different storage temperatures for 7 days from the naked eye.

**Table S1.** Comparison of the representative fluorescence-based dyes for viscosity detection reported in recent years.

| Probe                                                                               | Sources              | Stokes shift* | Application                                 | Reference |
|-------------------------------------------------------------------------------------|----------------------|---------------|---------------------------------------------|-----------|
| 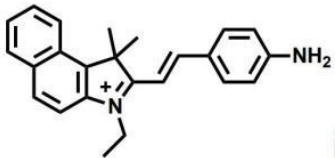   | Artificial synthesis | 72 nm         | Biological system, living cells.            | [1]       |
|    | Artificial synthesis | 90 nm         | Biological system, living cells.            | [2]       |
|    | Artificial synthesis | 20 nm         | Biological system, living cells.            | [3]       |
|  | Artificial synthesis | 35 nm         | Biological system, living cells, in vivo.   | [4]       |
|  | Artificial synthesis | 55 nm         | Biological system, living cells.            | [5]       |
|  | Artificial synthesis | 20 nm         | Biological system, living cells, rat slice. | [6]       |

|                                                                                     |                      |         |                                                   |           |
|-------------------------------------------------------------------------------------|----------------------|---------|---------------------------------------------------|-----------|
| 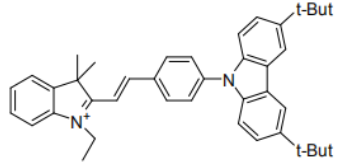   | Artificial synthesis | 83 nm   | Biological system, living cells.                  | [7]       |
|    | Artificial synthesis | 70 nm   | Biological system, living cell.                   | [8]       |
|    | Artificial synthesis | 90 nm   | Biological system, living cell, zebra fish, mice. | [9]       |
|    | Artificial synthesis | 90 nm   | Biological system, living cell.                   | [10]      |
|  | Artificial synthesis | 60 nm   | Biological system, living cell.                   | [11]      |
|  | Artificial synthesis | 148 nm  | Polymer solutions                                 | [12]      |
|  | Artificial synthesis | 20 nm   | Cellular imaging                                  | [13]      |
|  | Natural product      | 42.5 nm | Liquid system, food spoilage analysis.            | This work |

\* The Stokes shift herein was obtained from the absorption and emission measured in the glycerol.

**Table S2.** Optical properties of the molecular probe **XTH** in different solvents.

| Emitter | Quantum yield                      |                                       |
|---------|------------------------------------|---------------------------------------|
| XTH     | Quantum yield in water ( $\Phi$ )* | Quantum yield in glycerol ( $\Phi$ )* |
|         | 0.06%                              | 2.61%                                 |
|         | Fluorescence lifetime              |                                       |
|         | In water                           | In glycerol                           |
|         | 1.131 ns                           | 1.623 ns                              |

\* Estimated using Fluorescein as the standard (in 0.1 M NaOH solution).

**Table S3.** Fluorescence intensity of commercial liquids with the molecular probe **XTH**.

| Liquids             | Fluorescence intensity |
|---------------------|------------------------|
| Lime juice          | 50.81                  |
| Green pomelo juice  | 54.98                  |
| Passion fruit juice | 73.45                  |
| Milk                | 79.43                  |
| Kumquat juice       | 90.01                  |
| Seabuckthorn juice  | 129.21                 |
| Watermelon juice    | 140.22                 |
| Edible oil          | 490.34                 |
| Glycerol            | 2087.20                |

**Table S4.** Viscosity values of the liquids determined by viscometer and fluorescent spectrometer.

| Liquids             | Viscosity (cP) | Calculated (cP) |
|---------------------|----------------|-----------------|
| Lime juice          | 1.18           | 1.32            |
| Green pomelo juice  | 1.38           | 1.42            |
| Passion fruit juice | 2.37           | 2.48            |
| Milk                | 2.79           | 2.99            |
| Kumquat juice       | 3.32           | 3.03            |
| Seabuckthorn juice  | 6.52           | 6.63            |
| Watermelon juice    | 7.48           | 7.62            |
| Edible oil          | 68.00          | 68.79           |
| Glycerol            | 956.00         | 963.60          |



**Table S5.** Photo-physical properties of the molecular probe **XTH** in different solvents.

| Solvents     | Dielectric constant ( $\epsilon$ ) | $\eta$ (cP) | Absorption $\lambda_{ab}$ (nm) | Emission $\lambda_{em}$ (nm) |
|--------------|------------------------------------|-------------|--------------------------------|------------------------------|
| Glycerol     | 45.8                               | 956.0       | 382.5                          | 425.0                        |
| Water        | 78.5                               | 1.0         | 375.5                          | 468.5                        |
| Toluene      | 2.4                                | 0.6         | 365.1                          | 408.1                        |
| DMSO         | 46.8                               | 2.1         | 374.8                          | 458.9                        |
| Methanol     | 32.6                               | 0.6         | 369.3                          | 440.2                        |
| Acetonitrile | 37.5                               | 0.4         | 368.4                          | 433.7                        |
| DMF          | 36.7                               | 0.8         | 368.1                          | 431.7                        |
| EA           | 6.1                                | 0.4         | 321.8                          | 418.6                        |

## References

- 1 B. Chen, C. Li, J. Zhang, J. Kan, T. Jiang, J. Zhou and H. Ma, *Chem. Commun.*, 2019, **55**, 7410–7413.
- 2 G. Zhang, Y. Sun, X. He, W. Zhang, M. Tian, R. Feng, R. Zhang, X. Li, L. Guo, X. Yu and S. Zhang, *Anal. Chem.*, 2015, **87**, 12088–12095.
- 3 L.-L. Li, K. Li, M.-Y. Li, L. Shi, Y.-H. Liu, H. Zhang, S.-L. Pan, N. Wang, Q. Zhou and X.-Q. Yu, *Anal. Chem.*, 2018, **90**, 5873–5878.
- 4 M. Ren, L. Wang, X. Lv, J. Liu, H. Chen, J. Wang and W. Guo, *J. Mater. Chem. B*, 2019, **7**, 6181–6186.
- 5 L. Zhu, M. Fu, B. Yin, L. Wang, Y. Chen and Q. Zhu, *Dye. Pigment.*, 2020, **172**, 107859.
- 6 S. J. Park, B. K. Shin, H. W. Lee, J. M. Song, J. T. Je and H. M. Kim, *Dye. Pigment.*, 2020, **174**, 108080.
- 7 K. Zhou, M. Ren, B. Deng and W. Lin, *New J. Chem.*, 2017, **41**, 11507–11511.
- 8 Y. Baek, S. J. Park, X. Zhou, G. Kim, H. M. Kim and J. Yoon, *Biosens. Bioelectron.*, 2016, **86**, 885–891.
- 9 J. Yin, M. Peng and W. Lin, *Anal. Chem.*, 2019, **91**, 8415–8421.
- 10 Z. Zou, Q. Yan, S. Ai, P. Qi, H. Yang, Y. Zhang, Z. Qing, L. Zhang, F. Feng and R. Yang, *Anal. Chem.*, 2019, **91**, 8574–8581.
- 11 L. He, Y. Yang and W. Lin, *Anal. Chem.*, 2019, **91**, 15220–15228.
- 12 A. Y. Jee, E. Bae, and M. Lee, *J. Chem. Phys.*, 2010, **133**, 014507.
- 13 A. Vyšniauskas, I. López-Duarte, N. Duchemin, T. -T. Vu, Y. Wu, E. M. Budynina, Y. A. Volkova, E. P. Cabrera, D. E. Ramírez-Ornelas, and M. K. Kuimova, *Phys. Chem. Chem. Phys.*, 2017, **19**, 25252–25259
